# Supplementary material for: Boosting activity toward oxygen reduction reaction of a mesoporous FeCuNC catalyst via heteroatom doping-induced electronic state modulation
Source: Royal Society of Chemistry journal article supplement (doi:10.1039/d1ta07264a), 2022-01-01
Supplement: d1ta07264a1.pdf [file d1ta07264a1.pdf]

**Supplementary information**

**Boosting activity toward oxygen reduction reaction of a mesoporous FeCuNC catalyst  
via heteroatom doping-induced electronic state modulation**

Jong Gyeong Kim<sup>a</sup>, Jinwon Cho<sup>b</sup>, Seung Soon Jang<sup>b</sup>, Hyejin Lee<sup>c</sup>, Eunsung Yuk<sup>c,d</sup>, Byungchan  
Bae<sup>c,d</sup>, Sunghoon Han<sup>a</sup>, Chanho Pak<sup>a\*</sup>

<sup>a</sup>*Graduate School of Energy Convergence, Institute of Integrated Technology, Gwangju  
Institute of Science and Technology, Gwangju 61005, Republic of Korea*

<sup>b</sup>*School of Materials Science and Engineering, Georgia Institute of Technology, Atlanta GA  
30332-0245, United States*

<sup>c</sup>*Fuel Cell Laboratory, Korea Institute of Energy Research, Daejeon 34129, South Korea*

<sup>d</sup>*Renewable Energy Engineering, Korea University of Science and Technology (UST), 217,  
Gajeong-ro, Yuseong-gu, Daejeon 34113, South Korea*

**\*Corresponding author.** Email: chanho.pak@gist.ac.kr, tel.: +82-62-715-5324

Table S1. Specific surface area, micro-, meso-, and total pore volume of FeCu<sub>0.5</sub>NC, FeCu<sub>1.0</sub>NC,

|                        | $S_{\text{BET}}^{\text{a}}$<br>(m <sup>2</sup> /g) | $V_{\text{micro}}^{\text{b}}$<br>(cm <sup>3</sup> /g) | $V_{\text{meso}}^{\text{c}}$<br>(cm <sup>3</sup> /g) | $V_{\text{p}}^{\text{d}}$<br>(cm <sup>3</sup> /g) |
|------------------------|----------------------------------------------------|-------------------------------------------------------|------------------------------------------------------|---------------------------------------------------|
| FeCu <sub>0.5</sub> NC | 950                                                | 0.21                                                  | 0.70                                                 | 0.91                                              |
| FeCu <sub>1.0</sub> NC | 910                                                | 0.18                                                  | 0.76                                                 | 0.94                                              |
| FeCu <sub>1.5</sub> NC | 900                                                | 0.21                                                  | 0.60                                                 | 0.81                                              |

and FeCu<sub>1.5</sub>NC.

a: Specific surface area; b: Micropore volume; c: Mesopore volume; d: Total pore volume

Table S2. Composition of FeNC, FeCu<sub>1.0</sub>NC, and CuNC from ICP-OES, EA, and XPS survey.

|                        | ICP (wt.%) |     |      | EA (wt.%) |     |      | XPS (at%) |      |      |
|------------------------|------------|-----|------|-----------|-----|------|-----------|------|------|
|                        | Fe         | Cu  | C    | N         | S   | C    | N         | P    | S    |
| FeNC                   | 2.9        | -   | 78.1 | 4.1       | -   | 94.8 | 2.19      | 0.09 | -    |
| FeCu <sub>1.0</sub> NC | 3.2        | 2.5 | 77.1 | 4.2       | 0.5 | 94.5 | 2.21      | 0.08 | 0.17 |
| CuNC                   | -          | 2.7 | 71.1 | 3.9       | 0.4 | 95.9 | 2.17      | 0.14 | 0.15 |

Table S3. Composition of N species in FeNC, FeCu<sub>1.0</sub>NC, and CuNC.

| at%                    | Pyridinic N | M-N  | Pyrrolic N | Graphitic N | Oxidized N |
|------------------------|-------------|------|------------|-------------|------------|
| FeNC                   | 29.8        | 10.6 | 6.5        | 40.4        | 12.7       |
| FeCu <sub>1.0</sub> NC | 30.0        | 11.7 | 7.4        | 41.1        | 9.8        |
| CuNC                   | 29.2        | 10.0 | 5.9        | 40.7        | 14.2       |

Table S4. EXAFS fitting parameters of FeNC, FeCu<sub>1.0</sub>NC, and CuNC.

| Sample                    | Path  | <i>N</i> | <i>R</i> (Å) | $\sigma^2$ (Å <sup>2</sup> ) | $\Delta E_0$ (eV) | <i>R</i> , %   | <i>R</i> range | <i>k</i> range  |
|---------------------------|-------|----------|--------------|------------------------------|-------------------|----------------|----------------|-----------------|
| FeNC                      | Fe-N  | 3.10     | 2.03         | 0.007                        | 2.91              | 0.1<br>(0.001) | 1.0 –<br>2.4 Å | 2.0 –<br>8.0 Å  |
|                           | Fe-C1 | 1.09     | 2.05         | 0.002                        |                   |                |                |                 |
|                           | Fe-C2 | 3.73     | 2.63         | 0.015                        |                   |                |                |                 |
| FeCu <sub>1.0</sub> NC_Fe | Fe-N  | 3.09     | 1.98         | 0.013                        | -0.02             | 0.8<br>(0.008) | 0.9 –<br>2.0 Å | 2.5 –<br>9.4 Å  |
|                           | Fe-C  | 1.17     | 2.01         | 0.008                        |                   |                |                |                 |
| FeCu <sub>1.0</sub> NC_Cu | Cu-N  | 2.90     | 1.85         | 0.002                        | -11.98            | 0.9<br>(0.009) | 1.0 –<br>2.0 Å | 2.1 –<br>10.5 Å |
|                           | Cu-C  | 1.04     | 1.86         | 0.002                        |                   |                |                |                 |
| CuNC                      | Cu-N  | 2.94     | 1.91         | 0.005                        | -9.79             | 0.4<br>(0.004) | 1.0 –<br>2.0 Å | 2.5 –<br>9.7 Å  |
|                           | Cu-C  | 1.05     | 1.95         | 0.003                        |                   |                |                |                 |

❖ Amplitude reduction factor (*S*O<sup>2</sup>): Fe (0.78); Cu (0.86)

Table S5. Comparison of H<sub>2</sub>/O<sub>2</sub> AEMFC and PGM-free cathodes based on previously reported literature.

| Cathode catalyst                                | Catalyst loading (mg/cm <sup>2</sup> ) |             | Membrane             | Current density (A/cm <sup>2</sup> ) @0.6 V | Peak power density (W/cm <sup>2</sup> ) | Operating temperature (°C) |
|-------------------------------------------------|----------------------------------------|-------------|----------------------|---------------------------------------------|-----------------------------------------|----------------------------|
|                                                 | Cathode (NPMC)                         | Anode (PGM) |                      |                                             |                                         |                            |
| FeCu <sub>1.0</sub> NC (This study)             | 2.2                                    | 0.7         | FAA-3-50             | 0.49                                        | 0.294                                   | 70                         |
| CF-VC <sup>1</sup>                              | 2.4                                    | 0.7         | LDPE                 | 1.45                                        | 1.35                                    | 70                         |
| FeCoPc/C <sup>2</sup>                           | 0.3                                    | 1.0         | LDPE                 | 1.61                                        | 1.26                                    | 80                         |
| Fe-N-Gra <sup>3</sup>                           | 2.0                                    | 0.8         | HMT-PMBI             | 0.34                                        | 0.243                                   | 60                         |
| CoFe-N-CDC/CNT <sup>4</sup>                     | 0.75                                   | 0.74        | ETFE                 | 1.69                                        | 1.12                                    | 60                         |
| Fe-N-CDC/CNT <sup>4</sup>                       | 0.71                                   | 0.74        | ETFE                 | 1.13                                        | 1.06                                    | 60                         |
| N-C-CoO <sub>x</sub> <sup>5</sup>               | 2.4                                    | 0.7         | LDPE-BTMA            | 1.32                                        | 1.05                                    | 65                         |
| Fe/N/CNT <sup>6</sup>                           | 2.0                                    | 0.4         | aQAPS-S <sub>8</sub> | 0.47                                        | 0.49                                    | 60                         |
| Pyrolysed KB/FePc <sup>7</sup>                  | 2.0                                    | 0.8         | HMT-PMBI             | 0.22                                        | 0.186                                   | 60                         |
| FePc/C <sup>8</sup>                             | 1                                      | 0.4         | Tokuyama A901        | 0.19                                        | 0.120                                   | 55                         |
| Fe <sub>0.5</sub> -NH <sub>3</sub> <sup>9</sup> | 0.9                                    | 0.6         | HDPE                 | 1.78                                        | 1.4                                     | 65                         |
| New Fe-N-C <sup>10</sup>                        | 1                                      | 0.125       | HDPE                 | 1.70                                        | 1.3                                     | 80                         |
| New Fe-N-C <sup>10</sup>                        | 1                                      | 0.6         | HDPE                 | 2.72                                        | 2.05                                    | 80                         |

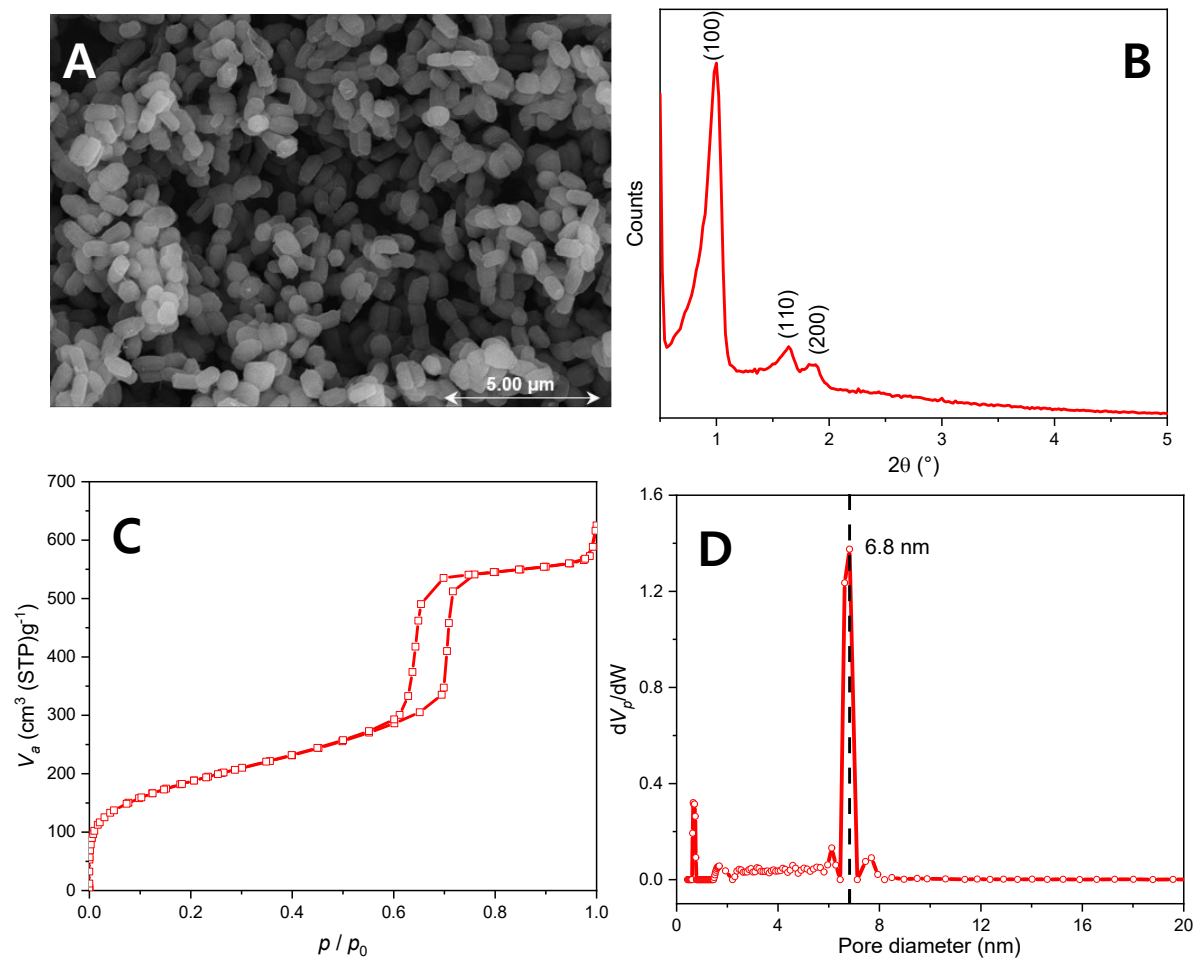

Figure S1. SEM image (A), XRD pattern (B),  $\text{N}_2$  adsorption isotherm, and pore size distribution of grain-shaped SBA-15.

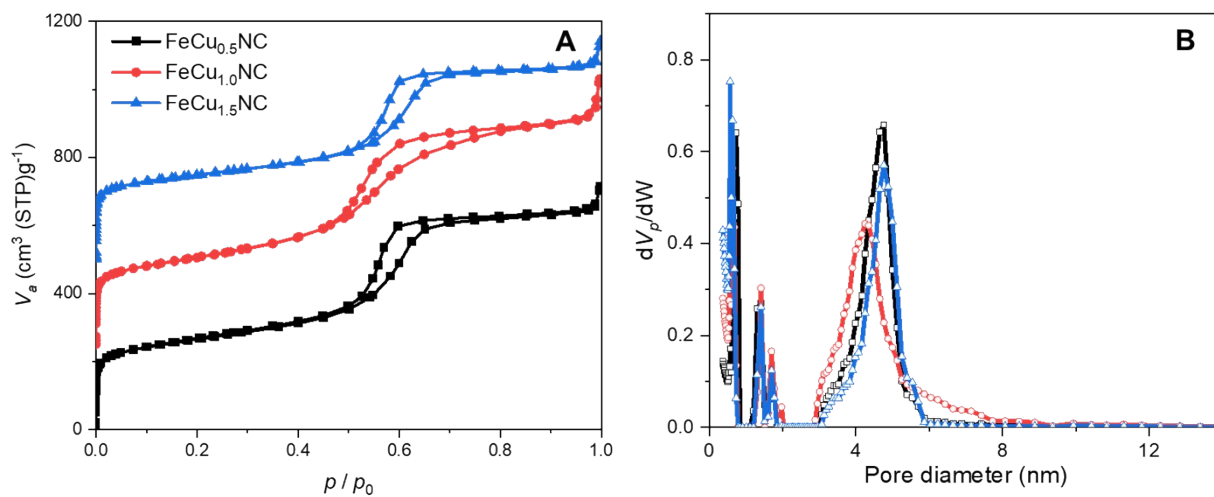

Figure S2. N<sub>2</sub> adsorption curves (A) and pore size distributions (B) of FeCu<sub>0.5</sub>NC, FeCu<sub>1.0</sub>NC, and FeCu<sub>1.5</sub>NC.



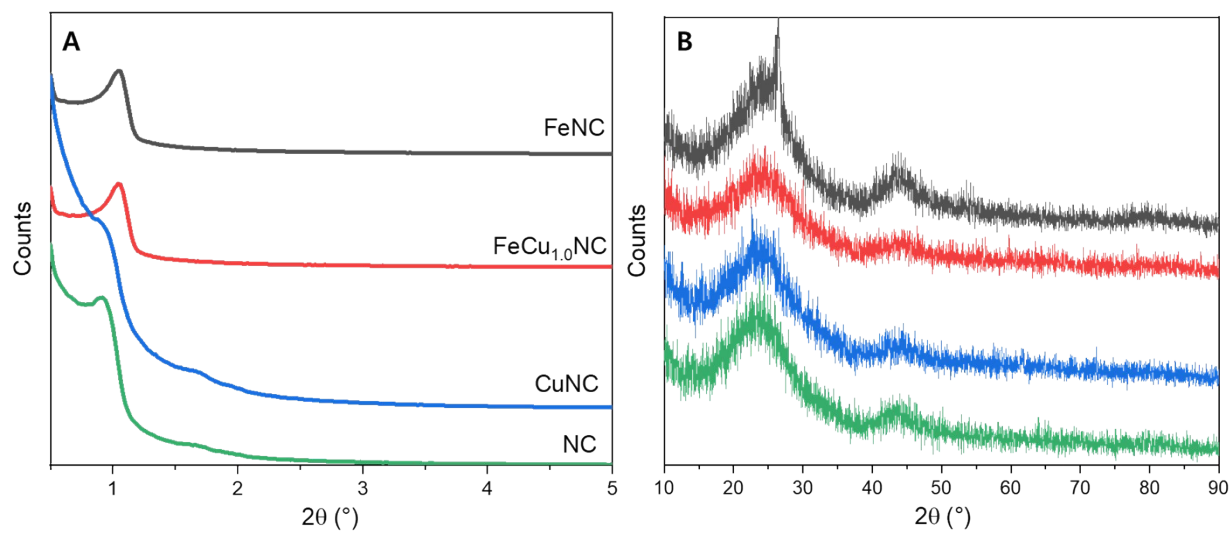

Figure S3. X-ray patterns at low-angle range (0.5–5°) (A) and mid-angle range (10–90°) (B) of FeNC, FeCu<sub>1.0</sub>NC, CuNC, and NC.

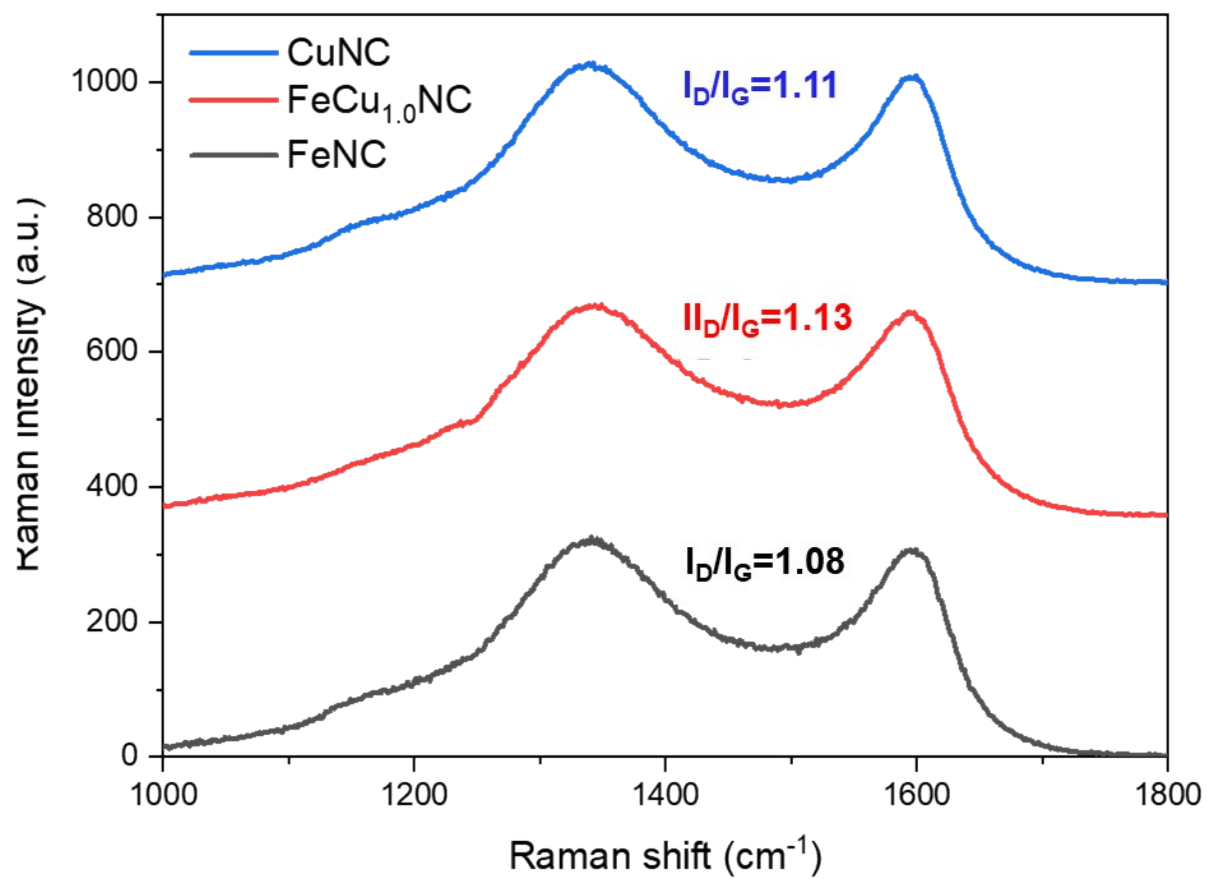

Figure S4. Raman spectra of FeNC, FeCu<sub>1.0</sub>NC, and CuNC.

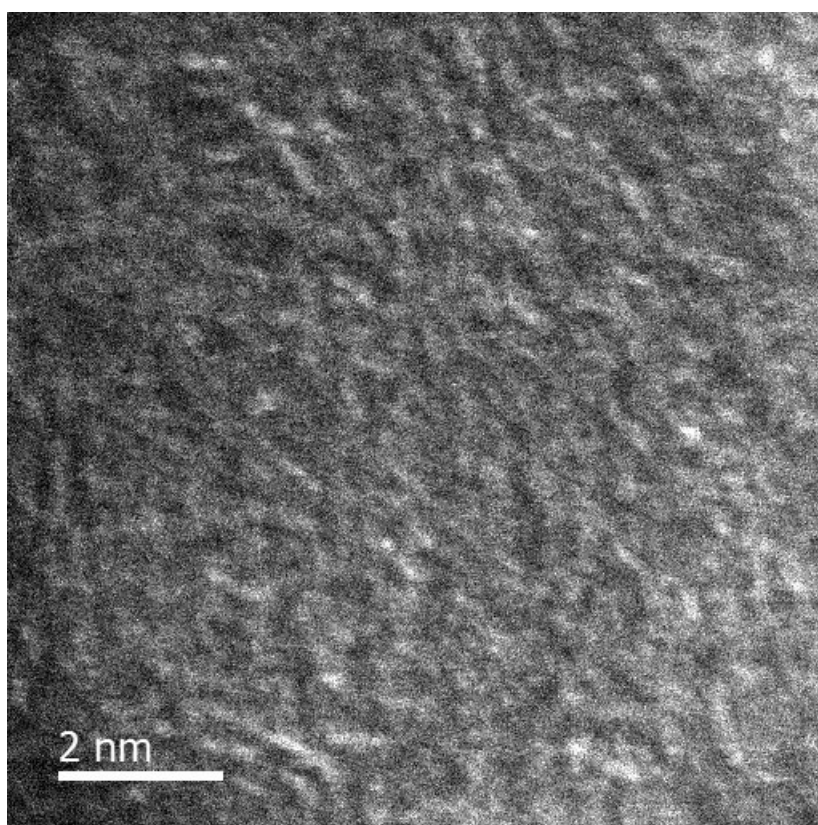

Figure S5. HAADF-STEM image of FeNC at atomic resolution.

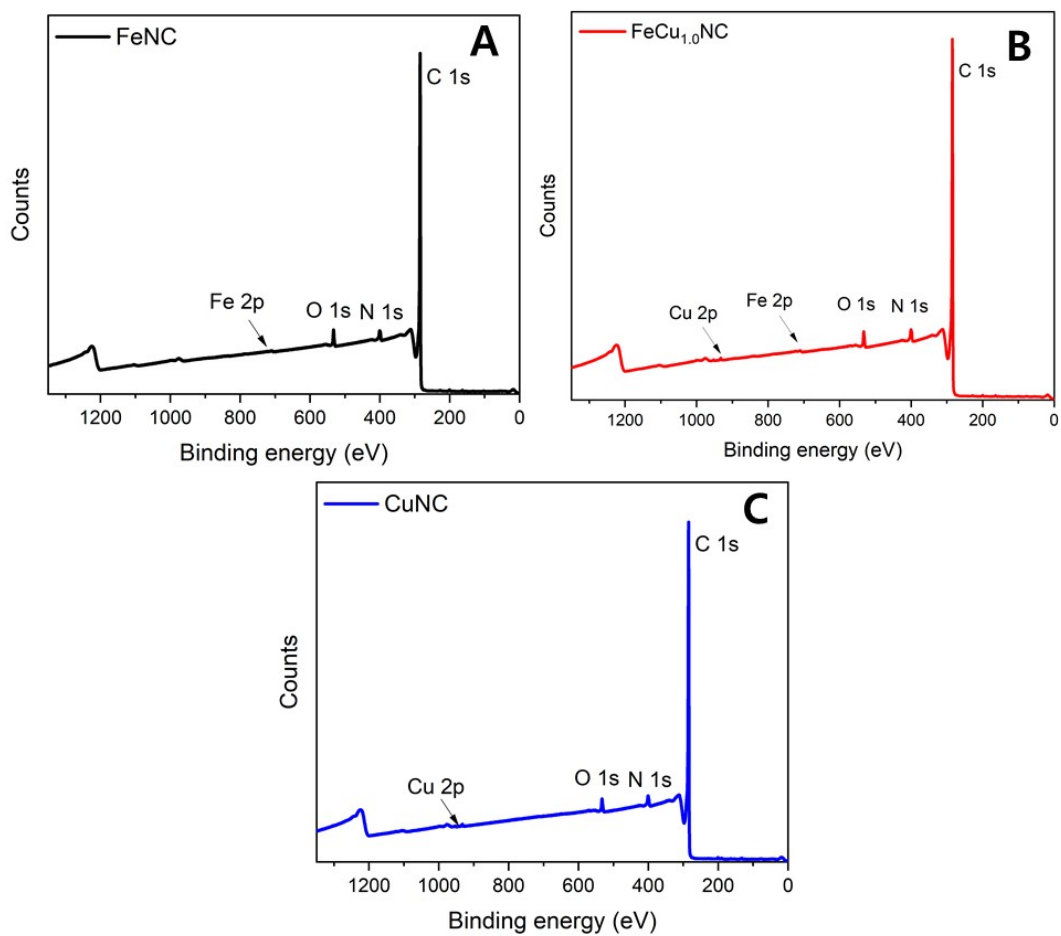

Figure S6. XPS survey of FeNC (A), FeCu<sub>1.0</sub>NC (B), CuNC (C).

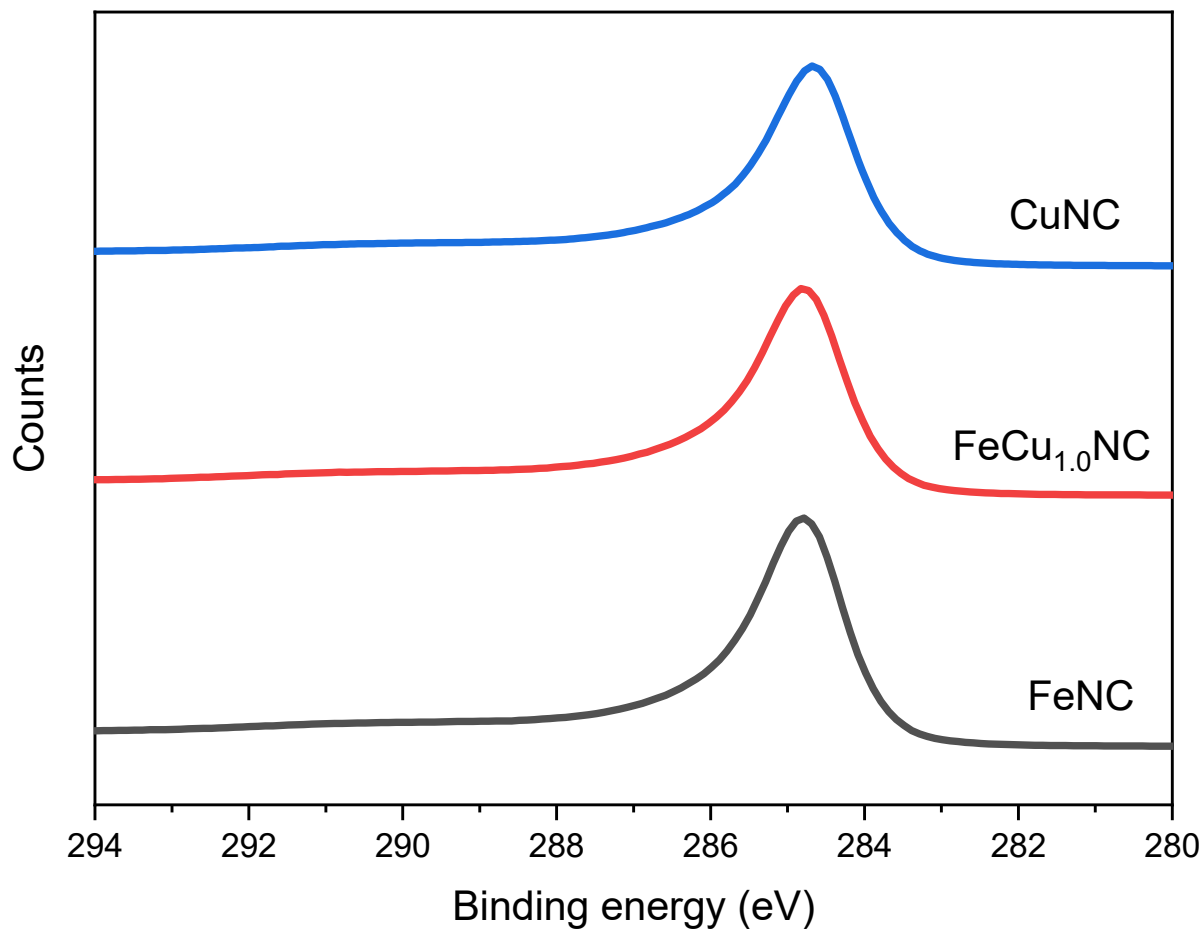

Figure S7. C1s spectra of FeNC, FeCu<sub>1.0</sub>NC, CuNC.

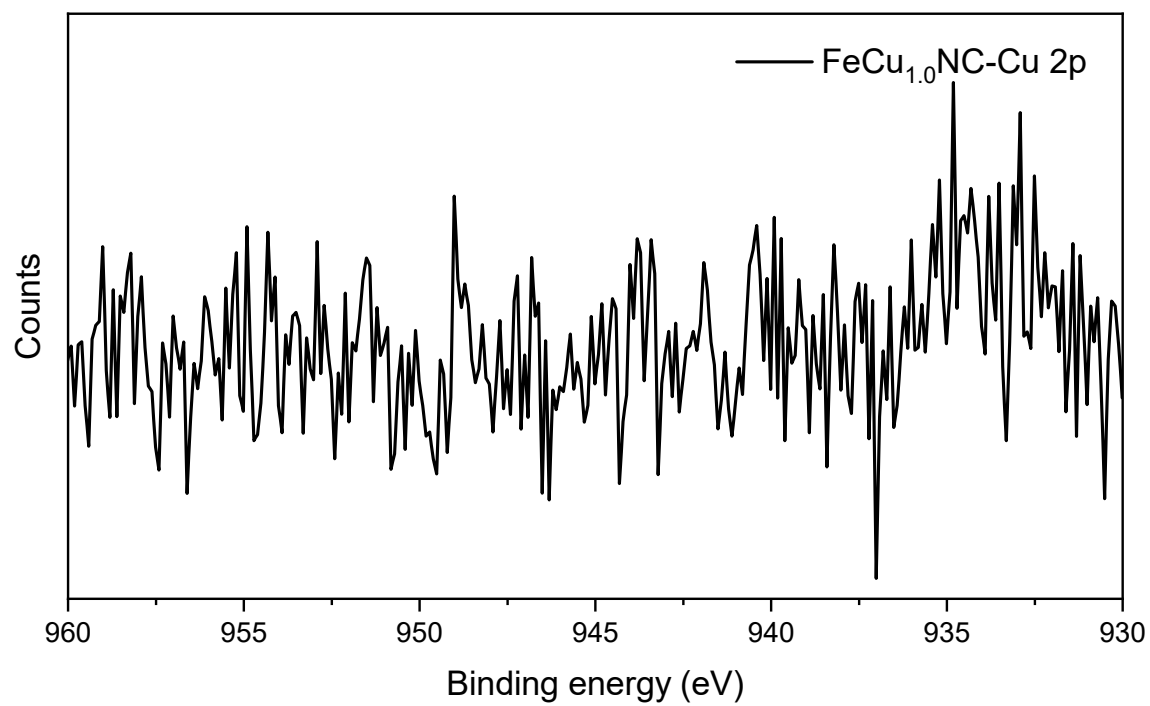

Figure S8. Cu 2p spectrum of FeCu<sub>1.0</sub>NC .

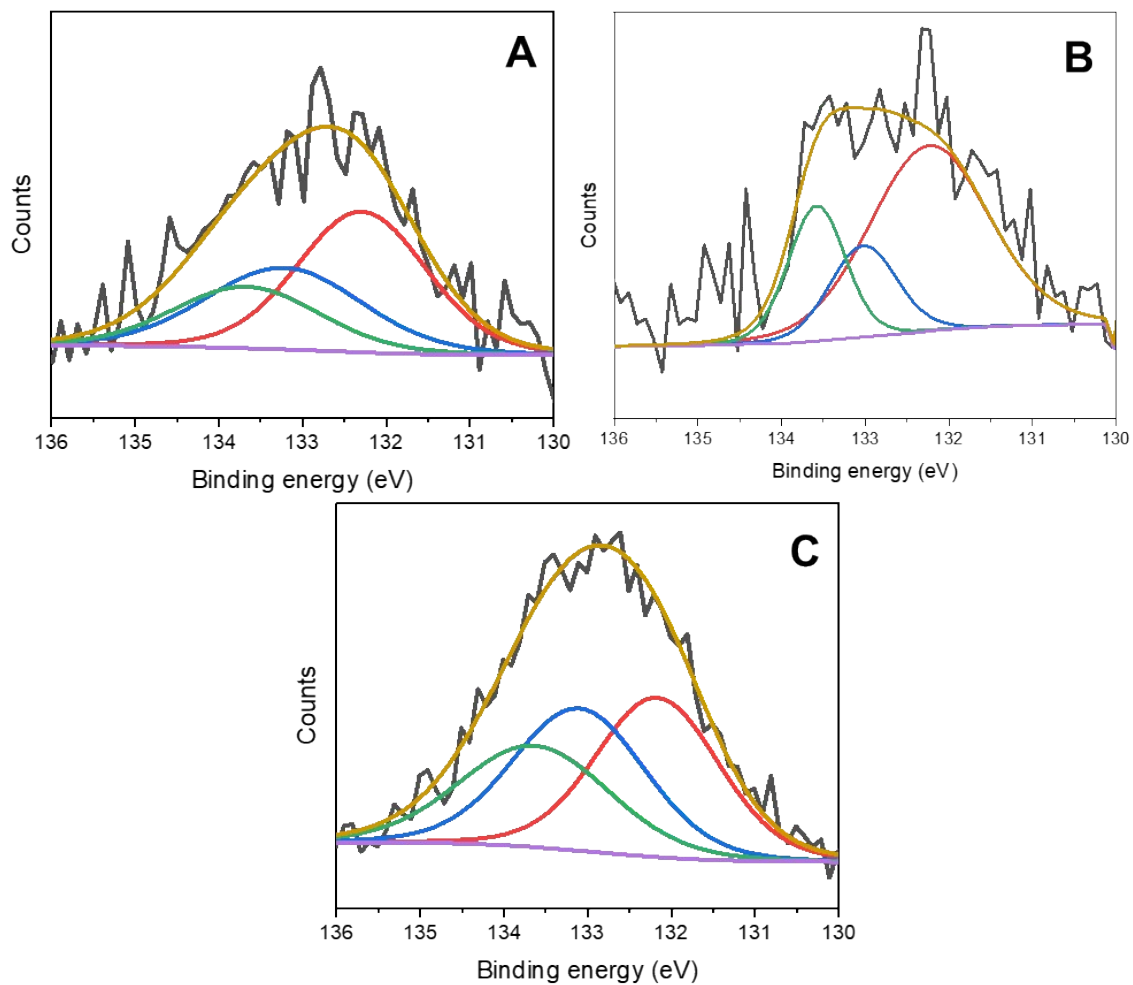

Figure S9. P 2p spectra of FeNC (A), FeCu<sub>1.0</sub>NC (B), CuNC (C).

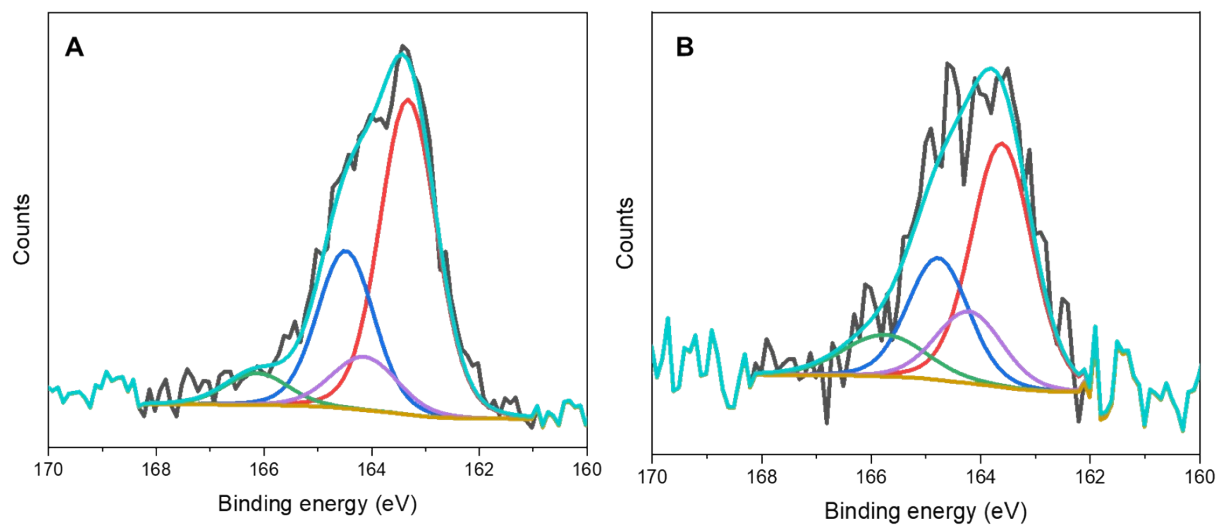

Figure S10. S 2p spectra of FeCu<sub>1.0</sub>NC (A), CuNC (B).



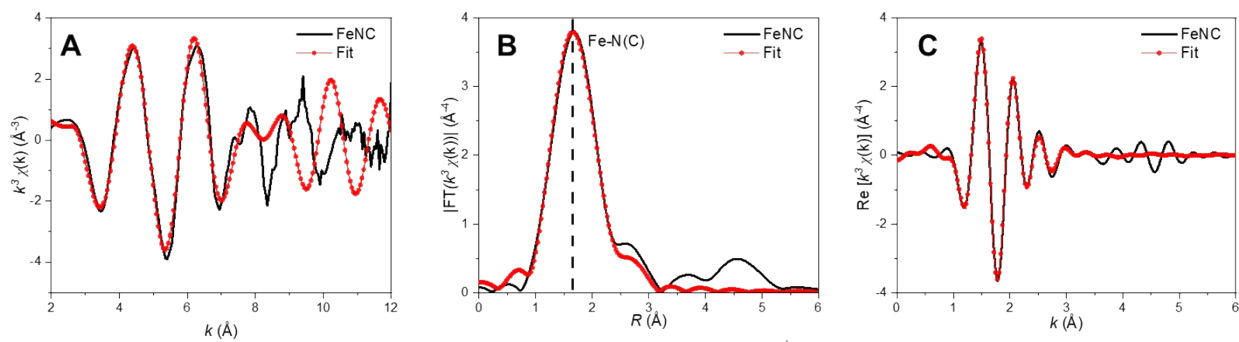

Figure S11. Raw data and their fit in  $k$  space (A),  $R_{\text{magnitude}}$  (B), and  $R_{\text{real}}$  (C) part of FeNC in the Fe K-edge.

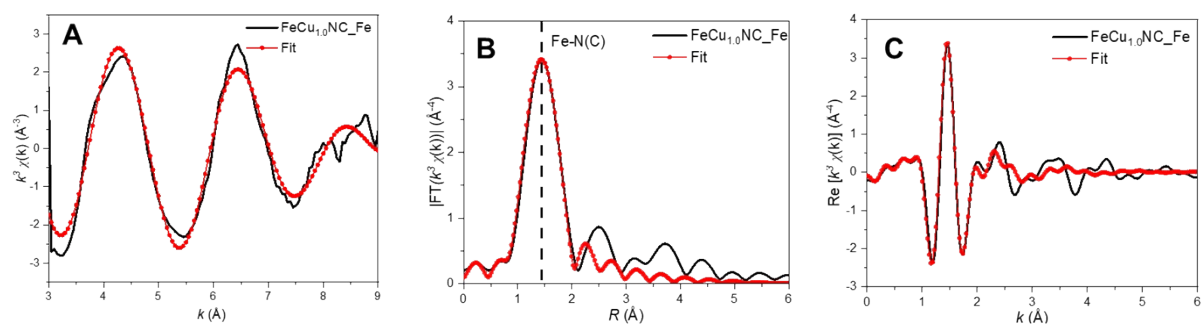

Figure S12. Raw data and their fit in  $k$  space (A),  $R_{\text{magnitude}}$  (B), and  $R_{\text{real}}$  (C) part of FeCuNC in the Fe K-edge.

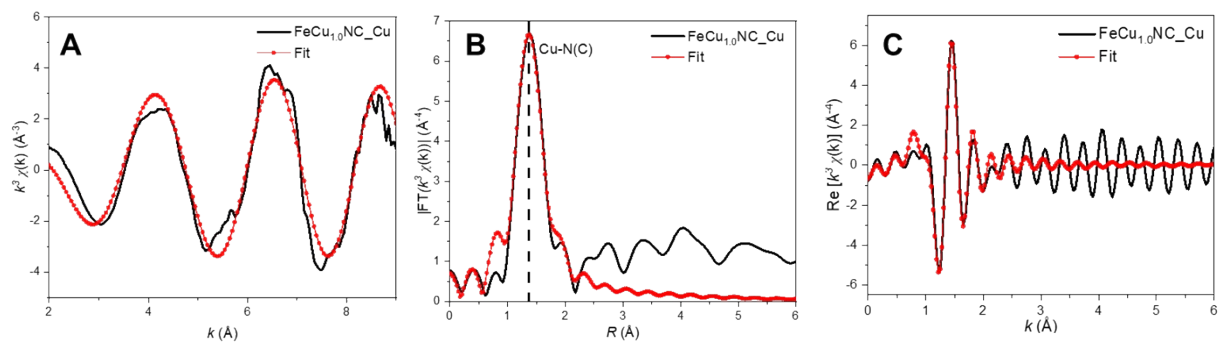

Figure S13. Raw data and its fit in  $k$  space (A),  $R_{\text{magnitude}}$  (B), and  $R_{\text{real}}$  (C) part of FeCu<sub>1.0</sub>NC in the Cu K-edge.

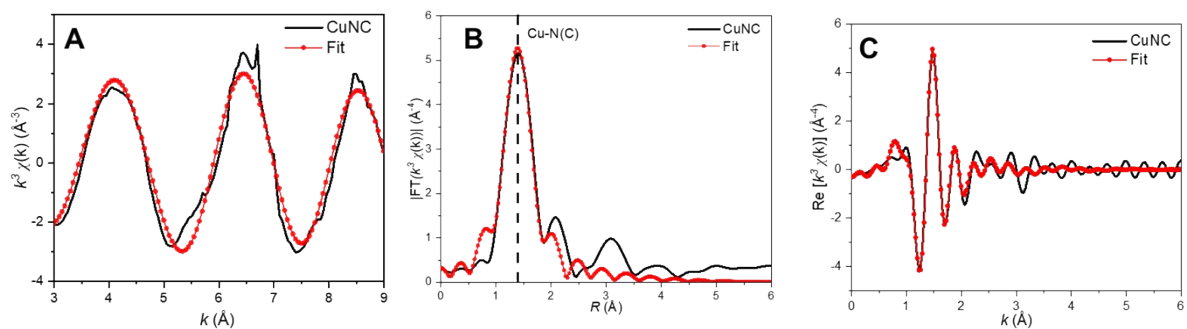

Figure S14. Raw data and its fit in  $k$  space (A),  $R_{\text{magnitude}}$  (B), and  $R_{\text{real}}$  (C) part of CuNC in the Cu K-edge.

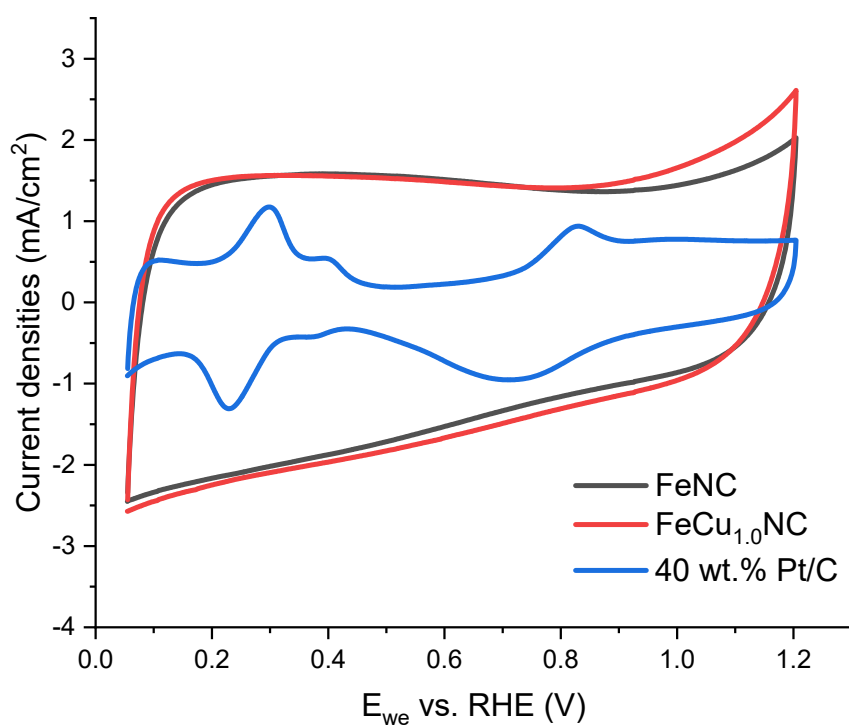

Figure S15. Cyclic voltammograms of FeNC, FeCu<sub>1.0</sub>NC, and 40 wt.% Pt/C in 0.1 M KOH.

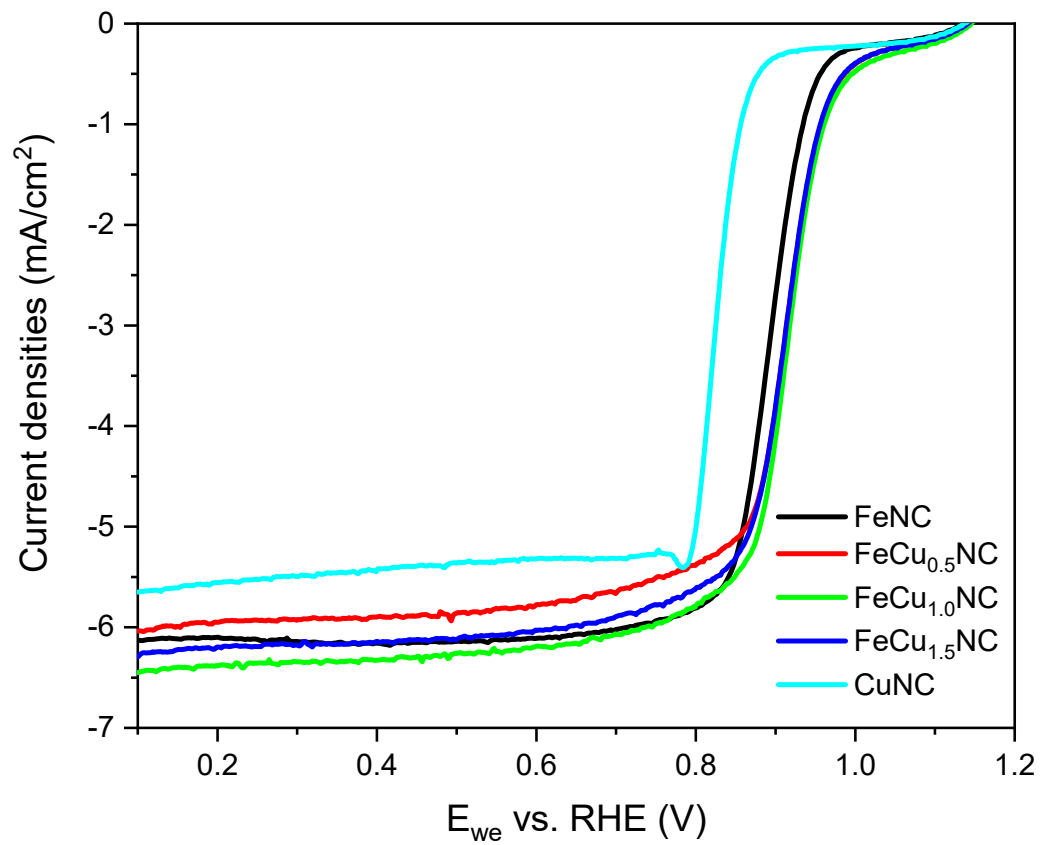

Figure S16. Linear sweep voltammogram of FeNC, FeCu<sub>0.5</sub>NC, FeCu<sub>1.0</sub>NC, FeCu<sub>1.5</sub>NC, and CuNC in 0.1 M KOH at 10 mV/s.

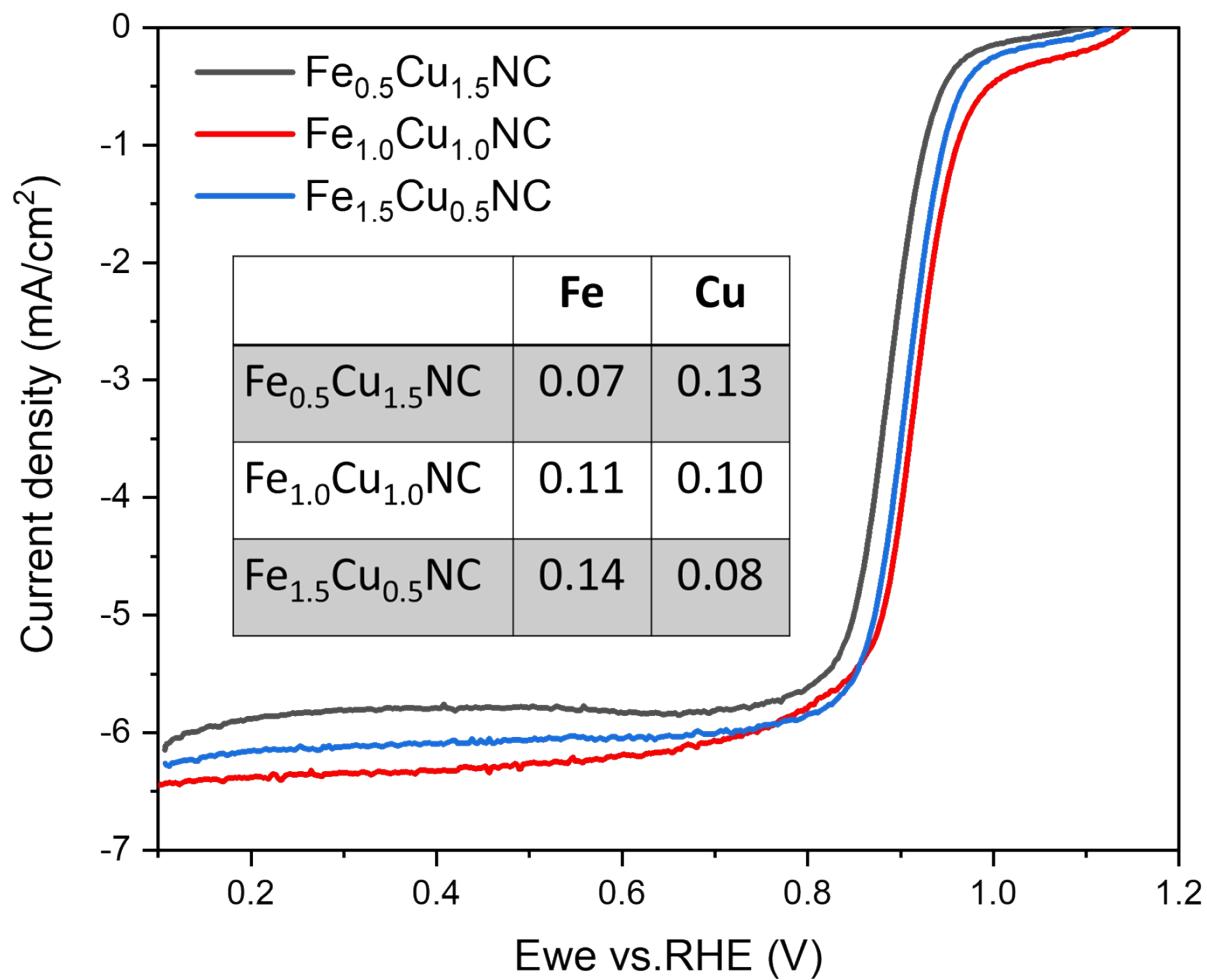

Figure S17. Linear sweep voltammogram of FeCuNC catalysts with different Fe to Cu atomic ratio in 0.1 M KOH at 10 mV/s. Inset table is amount of Fe and Cu (at%) measured from XPS.

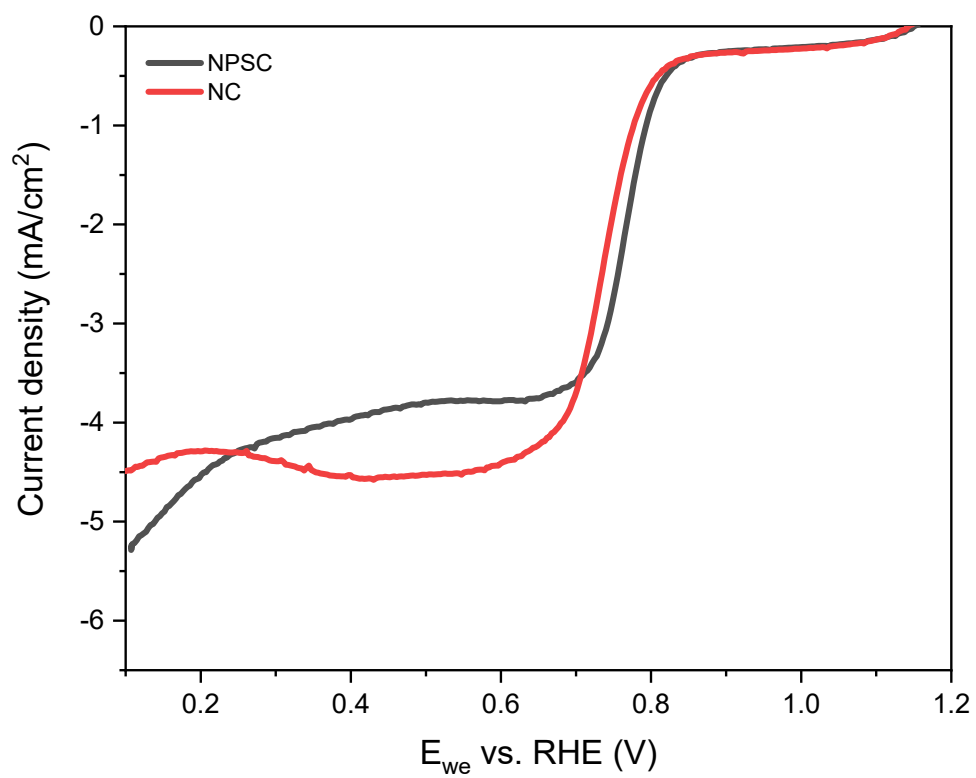

Figure S18. Linear sweep voltammogram of NC and NPSC in 0.1 M KOH at 10 mV/s.



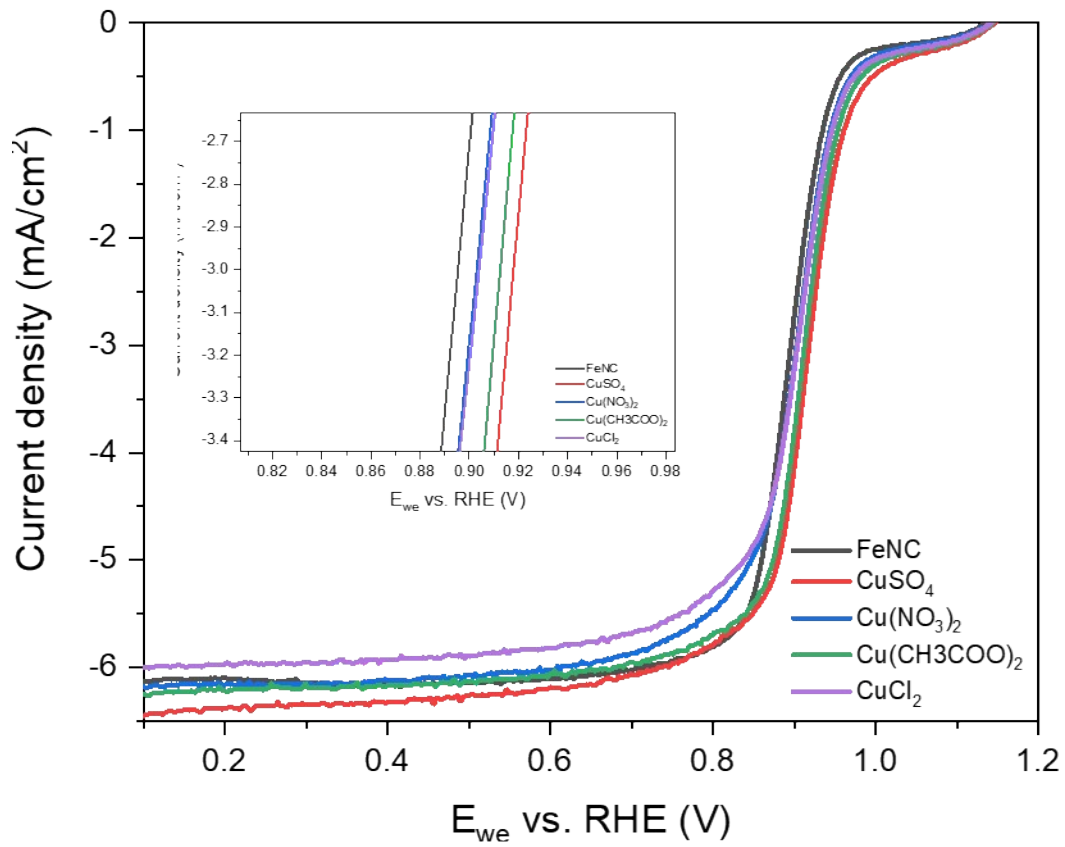

Figure S19. Linear sweep voltammogram of FeCuNC catalysts with different Cu precursors in 0.1 M KOH at 10 mV/s

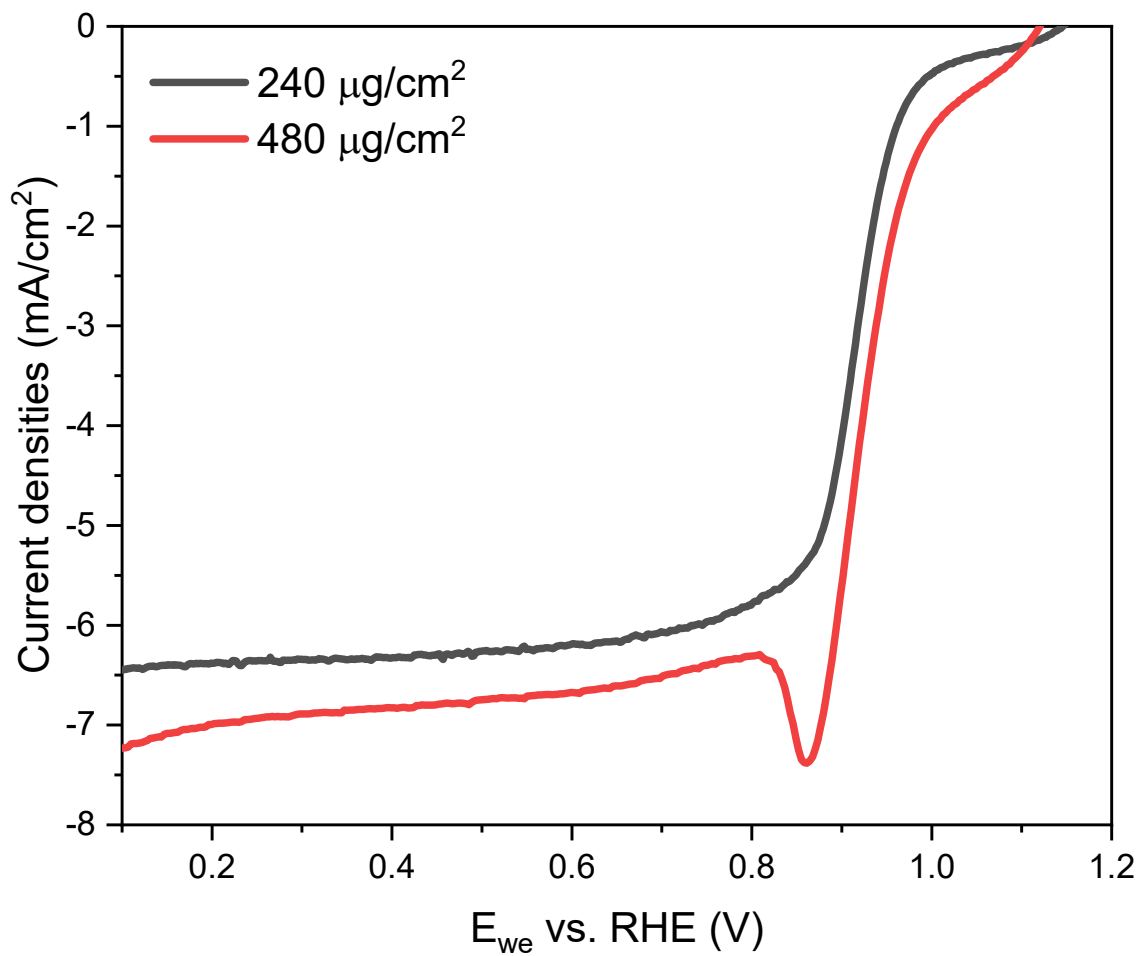

Figure S20. Linear sweep voltammogram of FeCu<sub>1.0</sub>NC with different loading amounts on a glassy carbon working electrode in 0.1 M KOH at 10 mV/s.

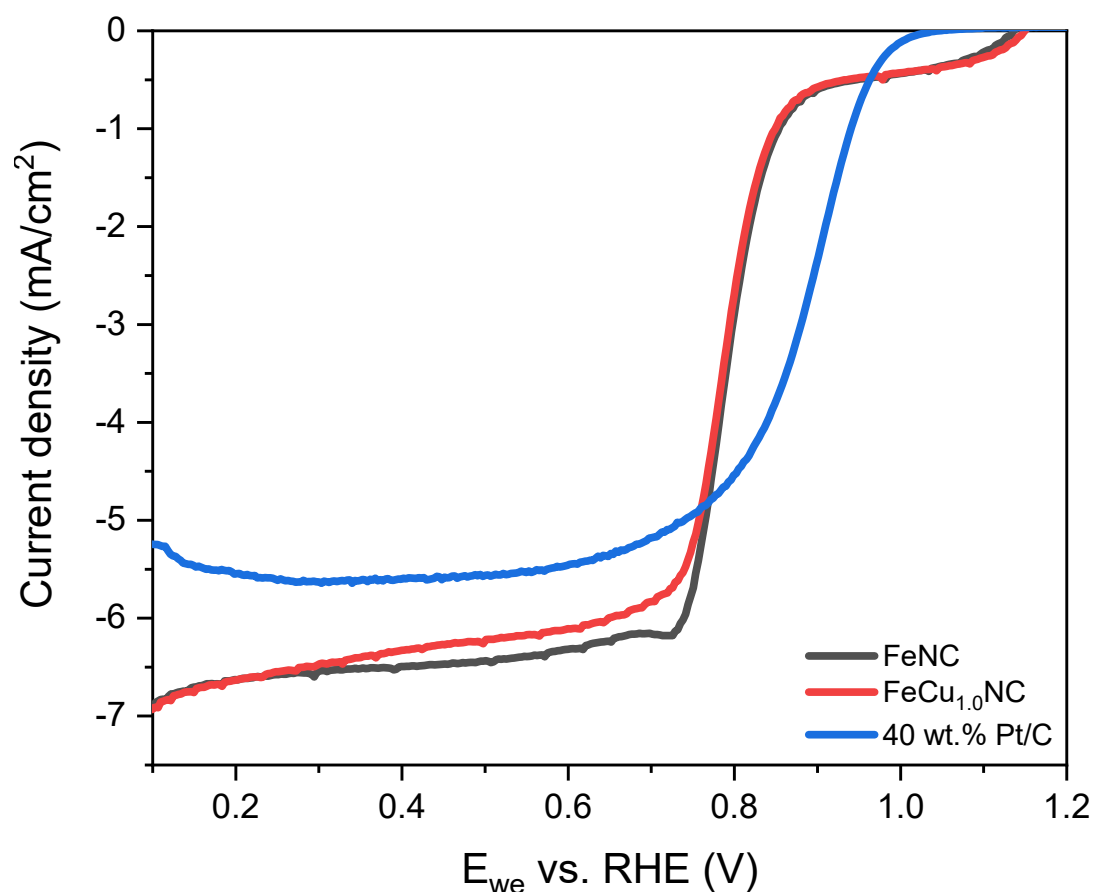

Figure S21. Linear sweep voltammogram of FeNC, FeCu<sub>1.0</sub>NC, and Pt/C in 0.1 M HClO<sub>4</sub> at 10 mV/s.

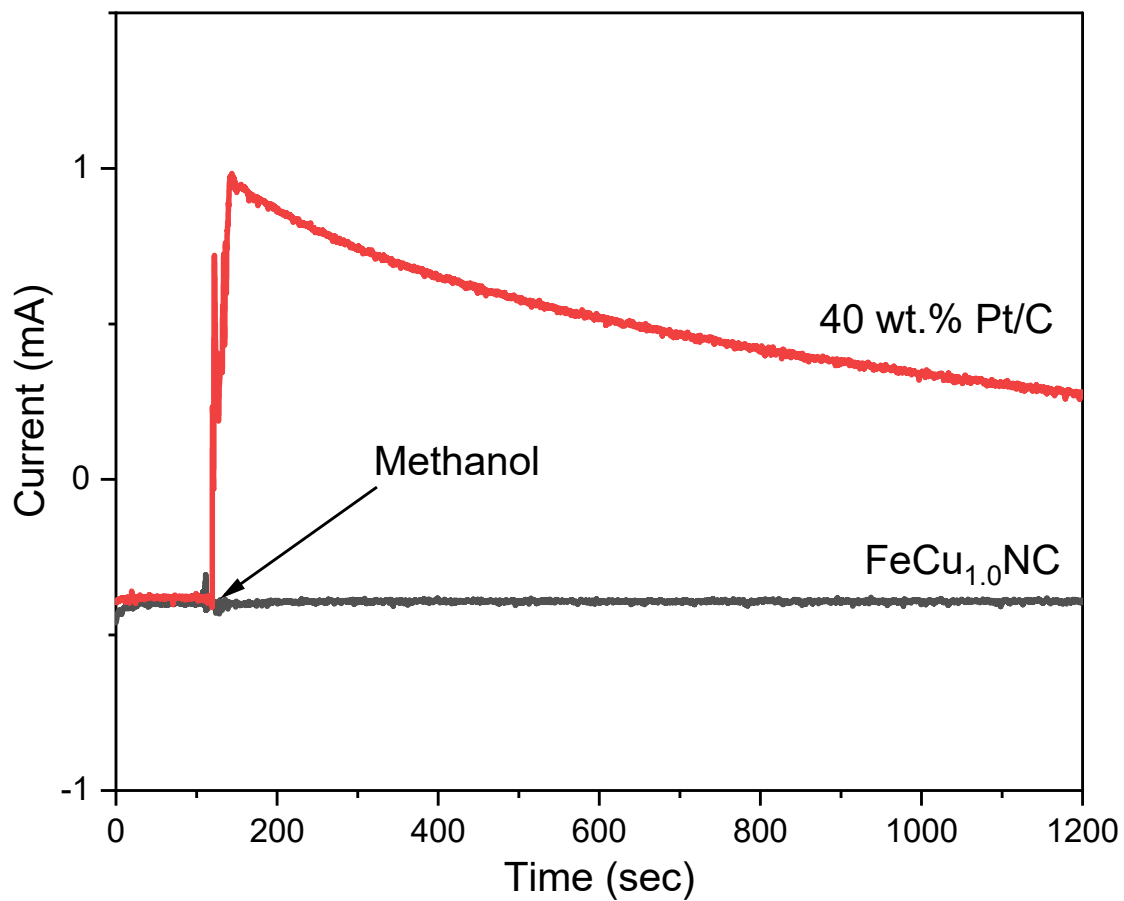

Figure S22. Methanol resistance of Pt/C and FeCu<sub>1.0</sub>NC.

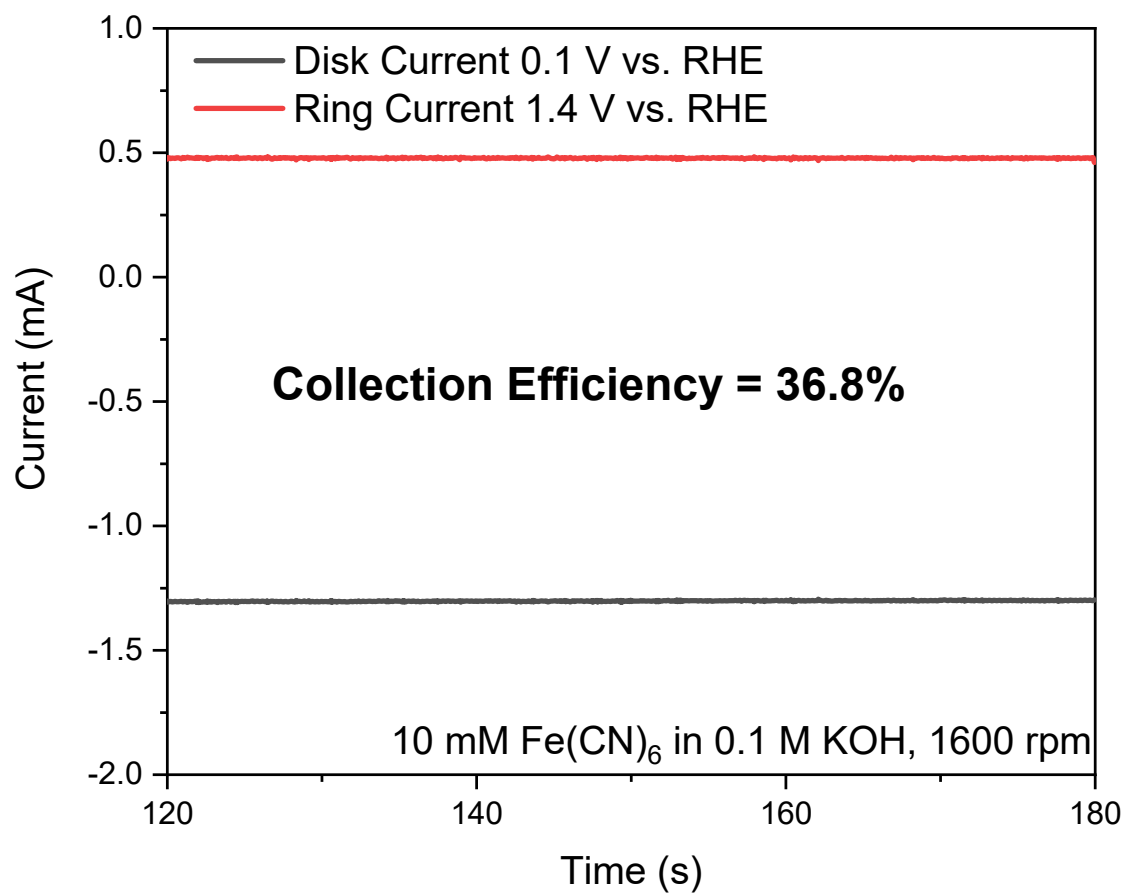

Figure S23. Result of collection efficiency experiment for FeCu<sub>1.0</sub>NC. Collection efficiency was calculated by averaging current densities in the last 60 s.

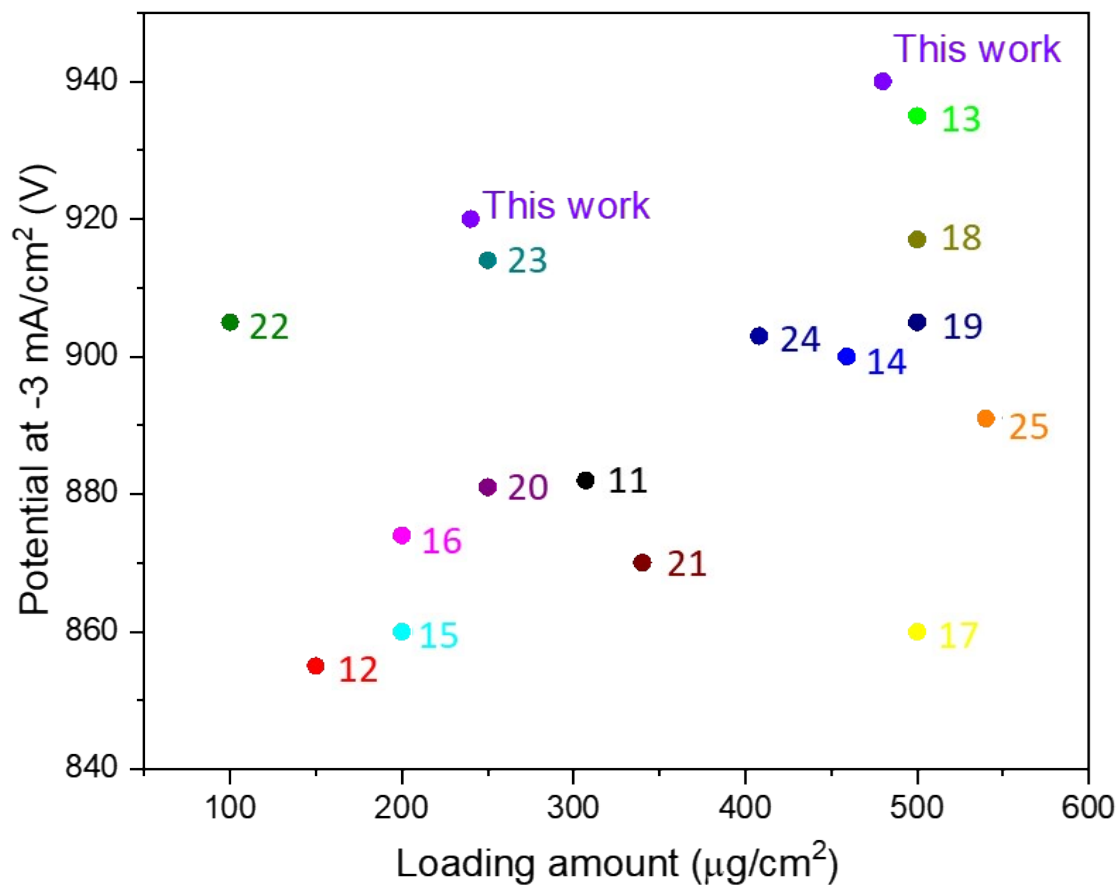

Figure S24. Comparison of the ORR (0.1 M KOH) catalytic activities (potential at -3 mA/cm<sup>2</sup>) determined in previous studies.

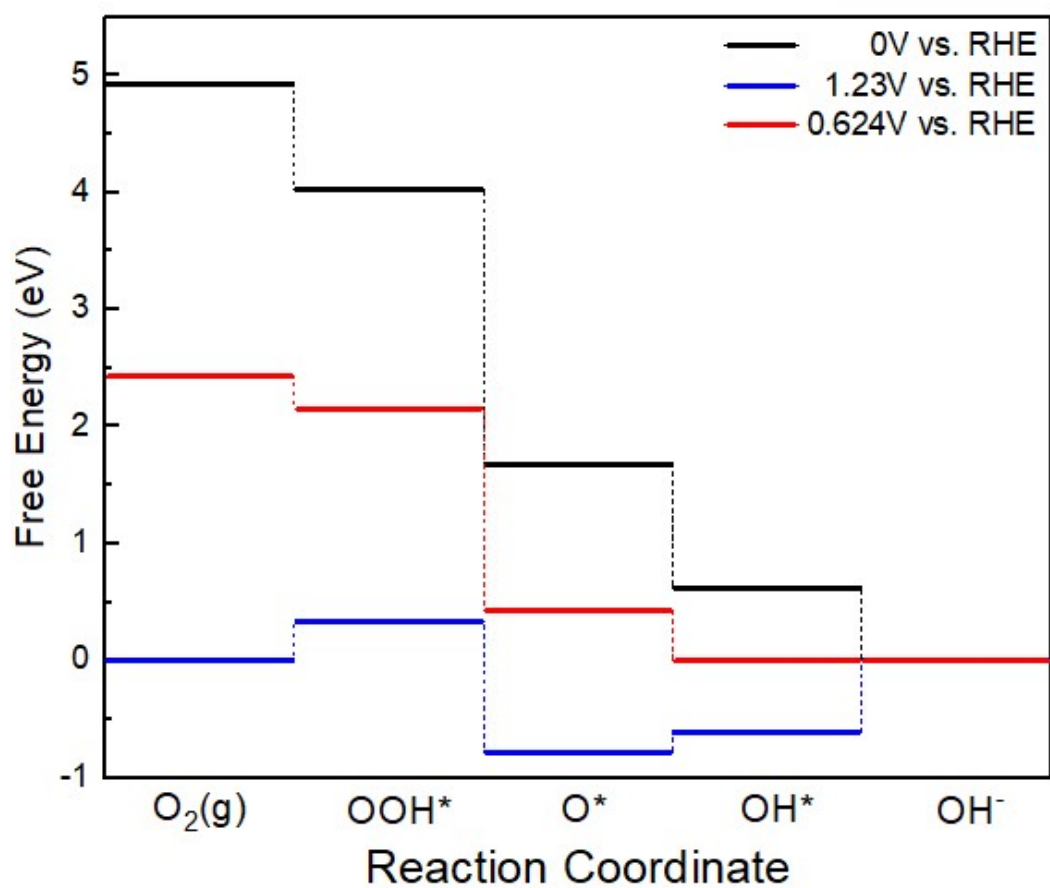

Figure S25. Calculated potential energy diagram at various applied potentials  $U$  for Fe-N<sub>3</sub>-C-P-S model, such as open circuit voltage (0 V), equilibrium potential (1.23 V), and onset potential versus RHE, which is displayed in black, blue, and red bars, respectively.

## References

1. X. Peng, V. Kashyap, B. Ng, S. Kurungot, L. Wang, J. Varcoe and W. Mustain, *Catalysts*, 2019, **9**, 264.
2. L. Wang, M. Bellini, H. A. Miller and J. R. Varcoe, *J. Mater. Chem. A*, 2018, **6**, 15404–15412.
3. R. Sibul, E. Kibena-Pöldsepp, S. Ratso, M. Kook, M. T. Sougrati, M. Käärrik, M. Merisalu, J. Aruväli, P. Paiste, A. Treshchalov, J. Leis, V. Kisand, V. Sammelselg, S. Holdcroft, F. Jaouen and K. Tammeveski, *ChemElectroChem*, 2020, **7**, 1739–1747.
4. J. Lilloja, E. Kibena-Pöldsepp, A. Sarapuu, J. C. Douglin, M. Käärrik, J. Kozlova, P. Paiste, A. Kikas, J. Aruväli, J. Leis, V. Sammelselg, D. R. Dekel and K. Tammeveski, *ACS Catal.*, 2021, **11**, 1920–1931.
5. X. Peng, T. J. Omasta, E. Magliocca, L. Wang, J. R. Varcoe and W. E. Mustain, *Angew. Chem. Int. Ed.*, 2018, **131**, 1058–1063.
6. H. Ren, Y. Wang, Y. Yang, X. Tang, Y. Peng, H. Peng, L. Xiao, J. Lu, H. D. Abruña and L. Zhuang, *ACS Catal.*, 2017, **7**, 6485–6492.
7. R. Praats, M. Käärrik, A. Kikas, V. Kisand, J. Aruväli, P. Paiste, M. Merisalu, J. Leis, V. Sammelselg, J. H. Zagal, S. Holdcroft, N. Nakashima and K. Tammeveski, *Electrochim. Acta*, 2020, **334**, 135575.
8. H. A. Miller, M. Bellini, W. Oberhauser, X. Deng, H. Chen, Q. He, M. Passaponti, M. Innocenti, R. Yang, F. Sun, Z. Jiang and F. Vizza, *Phys. Chem. Chem. Phys.*, 2016, **18**, 33142–33151.
9. H. A. Firouzjaie and W. E. Mustain, *ACS Catal.*, 2019, **10**, 225–234.
10. H. Adabi, A. Shakouri, N. Ul Hassan, J. R. Varcoe, B. Zulevi, A. Serov, J. R. Regalbuto and W. E. Mustain, *Nat. Energy*, 2021, **6**, 834–843.
11. Z. Xiao, Y. Wu, S. Cao, W. Yan, B. Chen, T. Xing, Z. Li, X. Lu, Y. Chen, K. Wang and J. Jiang, *Chem. Eng. J.*, 2021, **413**, 127395.
12. J. Lee, H. S. Kim, J.-H. Jang, E.-H. Lee, H.-W. Jeong, K.-S. Lee, P. Kim and S. J. Yoo, *ACS Sustain. Chem. Eng.*, 2021, **9**, 7863–7872.
13. Y.-M. Zhao, P.-C. Zhang, C. Xu, X.-Y. Zhou, L.-M. Liao, P.-J. Wei, E. Liu, H. Chen, Q. He and J.-G. Liu, *ACS Appl. Mater. Interfaces*, 2020, **12**, 17334–17342.
14. D. Wang, H. Xu, P. Yang, X. Lu, J. Ma, R. Li, L. Xiao, J. Zhang and M. An, *J. Mater. Chem. A*, 2021, **9**, 13678–13687.
15. X. Cui, L. Gao, S. Lei, S. Liang, J. Zhang, C. D. Sewell, W. Xue, Q. Liu, Z. Lin and Y. Yang, *Adv. Funct. Mater.*, 2021, **31**, 2009197.
16. X. Liang, Z. Li, H. Xiao, T. Zhang, P. Xu, H. Zhang, Q. Gao and L. Zheng, *Chem. Mater.*, 2021, **33**, 5542–5554.



17. L. Zheng, S. Yu, X. Lu, W. Fan, B. Chi, Y. Ye, X. Shi, J. Zeng, X. Li, and S. Liao, *ACS Appl. Mater. Interfaces*, 2020, **12**, 13878-13887.
18. J. Deng, S. Chen, Q. Zhou, Y. Nie, J. Li, R. Wu, Q. Wang and Z. Wei, *J. Power Sources*, 2020, **451**, 227808.
19. S. Yin, G. Li, X. Qu, J. Zhang, L. Shen, Y. Li, C. Wang, Z. Yu, B. Lu, B. Xu, Y. Jiang and S. Sun, *ACS Appl. Energy Mater.*, 2020, **3**, 625-634.
20. Y. Ha, B. Fei, X. Yan, H. Xu, Z. Chen, L. Shi, M. Fu, W. Xu and R. Wu, *Adv. Energy Mater.*, 2020, **10**, 2002592.
21. W. Gu, M. Wu, J. Sun, J. Xu and T. Zhao, *J. Mater. Chem. A*, 2019, **7**, 20132-20138.
22. W. Cheng, P. Yuan, Z. Lv, Y. Guo, Y. Qiao, X. Xue, X. Liu, W. Bai, K. Wang, Q. Xu and J. Zhang, *Appl. Catal., B*, 2020, **260**, 118198.
23. Z. Yang, Y. Wang, M. Zhu, Z. Li, W. Chen, W. Wei, T. Yuan, Y. Qu, Q. Xu, C. Zhao, X. Wang, P. Li, Y. Li, Y. Wu and Y. Li, *ACS Catal.*, 2019, **9**, 2158-2163.
24. Y. Chen, S. Ji, Y. Wang, J. Dong, W. Chen, Z. Li, R. Shen, L. Zheng, Z. Zhuang, D. Wang and Y. Li, *Angew. Chem., Int. Ed.*, 2017, **56**, 6937-6941.
25. F. Xiao, G.L. Xu, C.J. Sun, M. Xu, W. Wen, Q. Wang, M. Gu, S. Zhu, Y. Li, Z. Wei, X. Pan, J. Wang, K. Amine and M. Shao, *Nano Energy*, 2019, **61**, 60-68.
